# Supplementary material
Source: PubMed Central journal article supplement (PMC4168403)
Supplement: gf020sup_10-1055-s-0031-1298158.pdf [file gf020sup_10-1055-s-0031-1298158.pdf]

# Pilotstudie zur Detektion simulierter Läsionen mit einem 2-D resp. 3-D digitalen Vollfeld-Mammographiesystem und einem neu entwickelten hochauflösenden Detektor auf der Basis von 2 Shifts a-Selens

Pilot Study on the Detection of Simulated Lesions Using a 2D and 3D Digital Full-Field Mammography System with a Newly Developed High Resolution Detector Based on Two Shifts of a-Se

**Autoren** R. Schulz-Wendtland<sup>1</sup>, M. Bani<sup>2</sup>, M. P. Lux<sup>2</sup>, S. Schwab<sup>3</sup>, C. R. Loehberg<sup>2</sup>, S. M. Jud<sup>2</sup>, C. Rauh<sup>2</sup>, C. M. Bayer<sup>2</sup>, M. W. Beckmann<sup>2</sup>, M. Uder<sup>3</sup>, P. A. Fasching<sup>2</sup>, B. Adamietz<sup>1</sup>, M. Meier-Meitingner<sup>1</sup>

**Institute** <sup>1</sup> Gynäkologische Radiologie, Radiologisches Institut des Universitätsklinikums Erlangen, Erlangen  
<sup>2</sup> Frauenklinik, Universitätsklinikum Erlangen, Erlangen  
<sup>3</sup> Radiologisches Institut, Universitätsklinikum Erlangen, Erlangen

## Schlüsselwörter

- Mamma
- Mammakarzinom
- mammografische Dichte

## Key words

- breast
- breast tumor
- mammographic density

## Zusammenfassung

**Ziel:** Experimentelle Studie mit einem System zur Erstellung digitaler 2-D- resp. 3-D-Vollfeld-Mammografien (FFDM) und einem neu entwickelten hochauflösenden Detektor auf der Basis von 2 Shifts a-Selens.

**Material und Methode:** Die Untersuchungen wurden durchgeführt mit dem FFDM-System Amulet® (FujiFilm, Tokio, Japan): a-Se-Detektor (Rezeptor 24 × 30 cm<sup>2</sup>, Pixelgröße 50 µm, Speichertiefe 12 Bit, Auflösung 10 Lp/mm, DQE > 0,50). Integriert in den Detektor ist eine neue Methode des Datentransfers, basierend auf der Optical Switch Technology. Untersuchungsobjekt war das Wisconsin Mammographic Random Phantom, Model 152 A (Radiation Measurement Inc., Middleton, WI, USA). Es bestanden immer gleiche Untersuchungsparameter und Belichtungsdaten (Wolfram, 100 mAs, 30 kV). Wir fertigten 3 unterschiedliche Bilder (Aufnahmepaare) in c-c und ml Ebene (2-D) resp. in c-c und c-c Ebene mit einem Winkel von plus 4° (3-D) an. Fünf in der Mammografie erfahrene Radiologen (3 Monate bis mehr als 5 Jahre) werteten die zufallsverteilten Bilder (Monitoring) in Hinblick auf die Detektion von Aluminiumoxidpartikeln (200–740 µm), Nylonfäden (0,4–1,6 mm) und Rundherden (Durchmesser 5–14 mm), wobei zur 3-D-Visualisierung eine lineare Polfilterbrille (3-D) verwendet wurde, aus und verglichen die Ergebnisse. **Ergebnisse:** 225 richtig positive Entscheidungen waren möglich: Wir fanden für die 2-D- und 3-D-Visualisierung jeweils 222 (98,7%) richtig positive Ergebnisse.

**Schlussfolgerung:** Die Ergebnisse dieser Phantomstudie demonstrieren sowohl für die 2-D- als auch 3-D-Bildgebung in der digitalen Vollfeld-Mammografie gleiche Entdeckungsraten. Weitere klinische Studien sind hierzu notwendig.

## Abstract

**Purpose:** Experimental study of a new system for digital 2D and 3D full-field mammography (FFDM) using a high resolution detector based on two shifts of a-Se.

**Material and Methods:** Images were acquired using the new FFDM system Amulet® (FujiFilm, Tokio, Japan), an a-Se detector (receptor 24 × 30 cm<sup>2</sup>, pixel size 50 µm, memory depth 12 bit, spatial resolution 10 lp/mm, DQE > 0.50). Integrated in the detector is a new method for data transfer, based on optical switch technology. The object of investigation was the Wisconsin Mammographic Random Phantom, Model 152 A (Radiation Measurement Inc., Middleton, WI, USA) and the same parameters and exposure data (Tungsten, 100 mAs, 30 kV) were consistently used. We acquired 3 different pairs of images in the c-c and ml planes (2D) and in the c-c and c-c planes with an angle of 4 degrees (3D). Five radiologists experienced in mammography (experience ranging from 3 months to more than 5 years) analyzed the images (monitoring) which had been randomly encoded (random generator) with regard to the recognition of details such as specks of aluminum oxide (200–740 µm), nylon fibers (0.4–1.6 mm) and round lesions/masses (diameters 5–14 mm), using special linear glasses for 3D visualization, and compared the results.

**Results:** A total of 225 correct positive decisions could be detected: we found 222 (98.7%) correct positive results for 2D and 3D visualization in each case.

**Conclusion:** The results of this phantom study showed the same detection rates for both 2D and 3D imaging using full field digital mammography. Our results must be confirmed in further clinical trials.

**eingereicht** 17.11.2011  
**revidiert** 9.12.2011  
**akzeptiert** 9.12.2011

## Bibliografie

**DOI** <http://dx.doi.org/10.1055/s-0031-1298158>  
Geburtsh Frauenheilk 2012; 72  
© Georg Thieme Verlag KG  
Stuttgart · New York ·  
ISSN 0016-5751

## Korrespondenzadresse

**Prof. Dr. med. Rüdiger Schulz-Wendtland**  
Radiologisches Institut des  
Universitätsklinikums Erlangen  
Gynäkologische Radiologie  
Universitätsstraße 21–23  
91054 Erlangen  
ruediger.schulz-wendtland@  
uk-erlangen.de

## Einleitung

Die Entwicklung der digitalen Bildempfangssysteme in der Mammografie ist in den letzten Jahren so weit fortgeschritten, dass digitale Mammografiesysteme neben ihrem konventionellen Einsatz jetzt vor allem auch als Plattform für weiterführende, neuartige Untersuchungstechniken wie Kontrastmittelmamografie oder Tomosynthese genutzt werden können [1–6].

Die digitale Tomosynthese der Brust (DBT) hat das Potenzial, die unerwünschte Maskierung durch überlagerte Strukturen zu beseitigen und so die Anzahl der falsch positiven und falsch negativen Untersuchungsergebnisse zu verringern. Ob die DBT dabei als Alternative zur digitalen Mammografie gesehen werden kann oder nur ein additives Untersuchungsverfahren im Rahmen der Abklärungsdiagnostik darstellt, ist noch nicht entschieden [7–14].

Ein neuartiges Verfahren erstellt aus 2 Stereomammografieaufnahmen (Stereoskopie) (● **Abb. 3**) unter Verwendung einer linearen Polfilterbrille ein 3-dimensionales (3-D) Gesamtbild (Visualisierung) der Brust.

Ziel der vorliegenden Pilotstudie war es, die Detektion simulierter mammografischer Läsionen (Mikrokalzifikationen und tumorähnliche Verdichtungen) mit diesem neuartigen Mammografieverfahren zu untersuchen und mit den Ergebnissen an einem anderen bereits eingeführten Mammografiesystem zu vergleichen.

## Material und Methode

Für die Untersuchungen stand das digitale Mammografiesystem Amulet (Fa. FujiFilm, Tokio, Japan) zur Verfügung. Dieses System arbeitet mit einem  $24 \times 30 \text{ cm}^2$  großen, in das System fest integrierten Detektor [15, 16]. Dieser völlig neuartige Detektor ist aus 2 übereinander liegenden Schichten aus hochreinem amorphen Selen aufgebaut, die durch eine nur  $1 \mu\text{m}$  dicke Schicht aus dotiertem, das heißt gezielt mit Fremdatomen versehenen Selen, voneinander getrennt werden. Mit diesem Detektor wird eine Pixelgröße von  $50 \mu\text{m}^2$  realisiert.

Das Mammografiesystem ist mit einer Bimetall-Röntgenröhre ausgestattet, die wahlweise Molybdän oder Wolfram als Anodenmaterial in Kombination mit Molybdän- oder Rhodium-Filtern anbietet. Im Rahmen der vorliegenden Untersuchung wurden alle Aufnahmen mit manuell eingestellter Molybdän/Molybdän-Kombination und einem Röhrenstrom-Zeit-Produkt von 100 mAs bei einer Röhrenspannung von 30 kV angefertigt (● **Tab. 1**).

**Tab. 1** Kenngrößen des im Rahmen der Untersuchung eingesetzten Mammografiesystems.

|                                  | Amulet                       |
|----------------------------------|------------------------------|
| Hersteller                       | FujiFilm                     |
| Anode                            | Mo, W                        |
| Filter                           | Mo, Rh                       |
| Streustrahlungsraster            | linear                       |
| Konversionsmaterial              | Halbleiter<br>a-Se           |
| Ausleseprozess                   | optisch induzierte Auslesung |
| Pixelgröße                       | $50 \mu\text{m}$             |
| Ortsauflösung (Nyquist-Frequenz) | 10 lp/mm                     |
| Feldgröße                        | $24 \times 30 \text{ cm}^2$  |

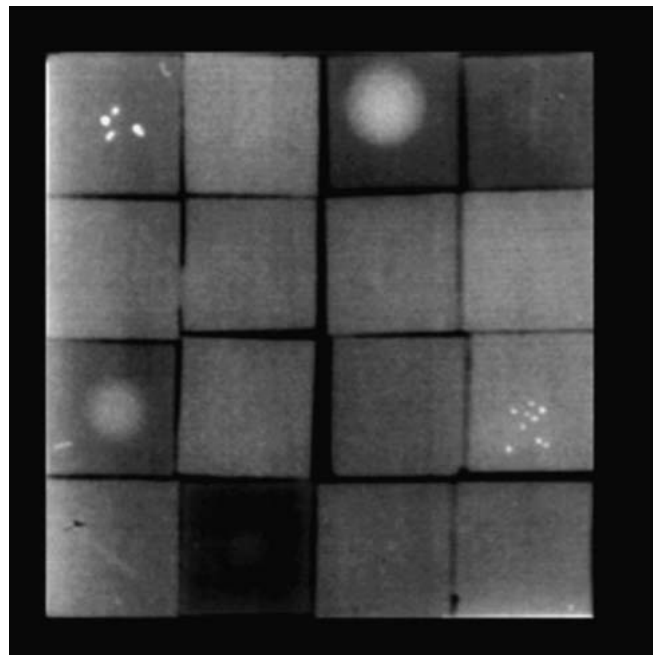

**Abb. 1** Wisconsin RMI Phantom, Model 152 A, Radiation Measurements, Middleton, WI, USA. 16 Waxquader mit  $4 \times$  Rundherden,  $5 \times$  Verkalkungen,  $6 \times$  Fäden,  $1 \times$  leer, durchstrahlte Höhe 4,5 cm, Nettodichte 1,5.

Wir fertigten zunächst 3 unterschiedliche Bilder (Aufnahmepaare) in c-c und ml Ebene (2-D) resp. in c-c und c-c Ebene mit einem Winkel von plus  $4^\circ$  (Stereoskopie) an.

Wie bereits bei früheren Studien [17] wurde als Testobjekt für die Untersuchung das Wisconsin Mammographic Random Phantom (Model 152 A, Gammex Inc.) gewählt (● **Abb. 1**). In diesem Phantom sind insgesamt 5 Elemente mit Mikrokalzifikationen, 6 mit fadenartigen Strukturen und 4 mit tumorähnlichen Massen enthalten. Diese 15 simulierten Läsionen befinden sich in separaten Wachsquadern im Phantom; zusätzlich ist ein leerer Wachsquader ohne Läsion vorhanden. Die losen Quader können gegeneinander vertauscht werden, sodass unterschiedliche Verteilungsmuster im Phantom realisiert werden können. Dadurch kann ein Lerneffekt bei den Auswertern vermieden werden. Das komplette Phantom bildet eine Standardbrust von ca. 4,5–5 cm Kompressionssschichtdicke nach.

Die Auswertung der Phantomaufnahmen erfolgte an einem  $2,5 \times 2,5$ -k-Monitor durch 5 Radiologen mit zeitlich differierender Mammografieerfahrung. Jedem Radiologen wurden 3 Aufnahmepaare (Bilder in c-c und ml Ebene) (2-D) mit unterschiedlicher Phantommzusammensetzung sowie in c-c und c-c Ebene mit einem Winkel von plus  $4^\circ$  unter Verwendung einer linearen Polfilterbrille (3-D) zur Auswertung präsentiert. Bei linearen Polfilterbrillen wird das Licht linear polarisiert, d. h. das Licht schwingt in einer vom Filter vorgegebenen Ebene. Hierbei müssen die Filter für die linke und rechte Ansicht im rechten Winkel zueinander ausgerichtet sein, um eine Trennung der beiden Ansichten zu ermöglichen und eine 3-D-Visualisierung zu erreichen (● **Abb. 2** und **3**). Die Betrachtungszeit pro Aufnahme war auf maximal 5 Minuten begrenzt. Im Rahmen der Untersuchung sollte die Sensitivität der Detektion mit dem neuen Mammografieverfahren beurteilt werden – daher wurde die Richtig-positiv-Rate für jeden einzelnen Läsionstyp ermittelt.

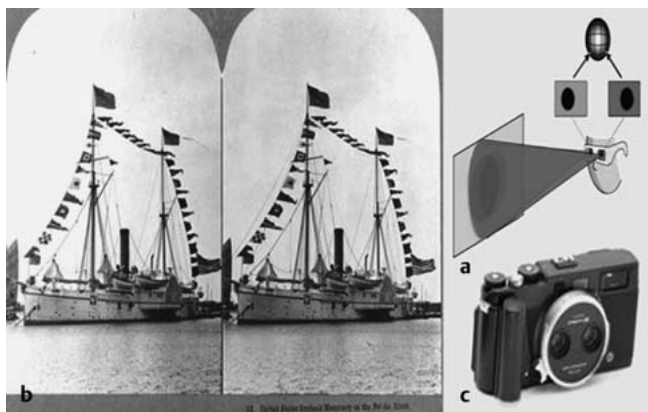

**Abb. 2 a bis c** Stereoskopie. Der menschliche Augenabstand beträgt ungefähr 65 mm, d. h., dass jedes Auge einen unterschiedlichen Blick auf die 3-dimensionale Welt hat. Durch diese 2 unterschiedlichen Blicke des virtuellen Systems können wir die relative Tiefe unterschiedlicher Objekte in der visuellen Szene dadurch bestimmen, dass die 2 unabhängigen Bilder durch das Gehirn zur Tiefenbestimmung fusioniert werden (a und b). Dieses Verfahren wird in der Fotografie durch 2 Standardaufnahmen (0°- sowie 4°-Projektion) verwandt, um das natürliche Sehen zu simulieren (c).

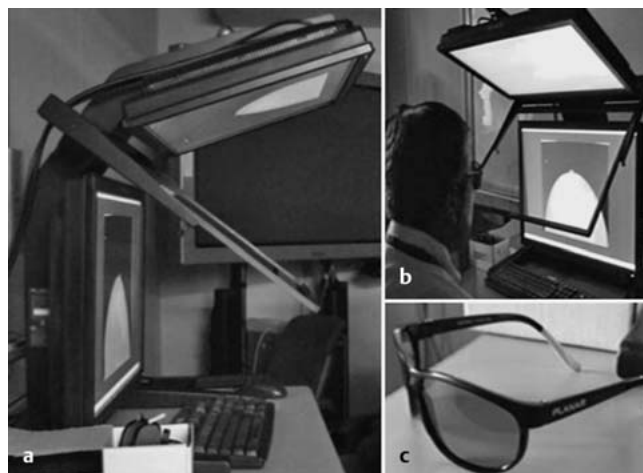

**Abb. 3 a bis c** 3-D digitale Vollfeldmammografie. Monitoring mit Mammografien in c-c und c-c Ebene mit einem Winkel von plus 4° (Stereoskopie) (a und b) unter Verwendung einer linearen Polfilterbrille, um ein 3-D-Gesamtbild der Brust zu erhalten (c).

## Ergebnisse

In **Tab. 2** sind die über die 5 Auswerter gemittelten Ergebnisse der Untersuchung dargestellt, aufgeschlüsselt nach dem verwendeten digitalen Mammografiesystem bei unterschiedlichen Untersuchungsverfahren (2-D resp. 3-D) und Läsionstyp. Zusätzlich wird die Anzahl der jeweils tatsächlich vorhandenen Läsionen und die sich daraus ergebende Detektionsrate sowie ein über die 3 Läsionsarten gemitteltes Ergebnis angegeben.

Mit dem digitalen Mammografiesystem und dem Doppelschicht-Selen-Detektor ergaben sowohl für die 3 Aufnahmepaare (Bilder in c-c und ml Ebene) (2-D) mit unterschiedlicher Phantomzusammensetzung resp. den 3 Aufnahmepaaren in c-c und c-c Ebene mit einem Winkel von plus 4° (Stereoskopie) unter Verwendung einer linearen Polfilterbrille zur Visualisierung (3-D) insgesamt jeweils eine Detektionsrate von 98,7%.

## Diskussion

Das wichtigste bildgebende Verfahren zur Frühdiagnostik des Mammakarzinoms ist nach wie vor die Röntgenmammografie. Sie ist das einzige Verfahren, für das nachgewiesen wurde, dass sein Einsatz im qualitätsgesicherten Screening die Brustkrebsmortalität senken kann. Als mammografisches Standardverfahren gilt heute sowohl in der kurativen Mammografie als auch

bei der Untersuchung symptomloser Frauen im Mammografie-Screening die digitale Vollfeldmammografie (engl.: „full-field digital mammography“, FFDM), die insbesondere für Frauen mit dichter Brust bei der Entdeckung auffälliger Befunde der herkömmlichen Film-Folien-Mammografie überlegen ist [1–6]. Aber auch die digitale Mammografie leidet wie alle radiologischen Projektionsverfahren darunter, dass sie eine 3-dimensionale Information in einem 2-dimensionalen Bild darstellt. Übereinander liegende Strukturen werden dabei in eine Bildebene projiziert, sodass klinisch relevante Läsionen leicht durch Gewebeüberlagerungen verdeckt werden. Dadurch werden falsch negative Befunde häufiger, d. h. vorhandene Karzinome werden übersehen. Andererseits können solche Überlagerungen normalen Brustgewebes auch zu falsch positiven Ergebnissen führen, indem sie maligne Läsionen vortäuschen, die dann zu einer unnötigen Wiedereinbestellung der Patientin und Abklärungsuntersuchungen bis hin zur Biopsie führen können.

Die Entwicklung der digitalen Bildempfangssysteme ist in den letzten Jahren so weit fortgeschritten, dass digitale Mammografiesysteme neben ihrem konventionellen Einsatz jetzt vor allem auch als Plattform für weiterführende, neuartige Untersuchungstechniken wie Kontrastmittelmammografie oder Tomosynthese genutzt werden können. Die digitale Tomosynthese der Brust (engl.: „digital breast tomosynthesis“, DBT) ist eine Aufnahmetechnik, die auf der Basis einer begrenzten Anzahl von Einzelaufnahmen mit unterschiedlichem Projektionswinkel überlage-

**Tab. 2** Anzahl der mit dem digitalen Mammografiesystem richtig detektierten simulierten Läsionen sowie die Detektionsrate in Prozent gemittelt über die 5 Auswerter und jeweils 3 Phantomkonfigurationen (c-c und ml Ebene [2-D] resp. c-c und c-c plus 4°-Ebene [3-D]).

|                      | Amulet<br>c-c und obliq. Ebene<br>2-D | Amulet<br>c-c und c-c plus 4°-Ebene<br>3-D | tatsächlich<br>vorhandene<br>Läsionen |
|----------------------|---------------------------------------|--------------------------------------------|---------------------------------------|
| Fäden                | 18,0 (100%)                           | 18,0 (100%)                                | 18                                    |
| Mikrokalzifikationen | 14,3 (95,6%)                          | 14,3 (95,6%)                               | 15                                    |
| tumorähnliche Massen | 12,0 (100%)                           | 12,0 (100%)                                | 12                                    |
| alle Läsionen        | 44,4 (98,7%)                          | 44,4 (98,7%)                               | 45                                    |

rungsfreie Schichtaufnahmen liefern kann. Die Belichtungsparameter für jede Einzelschicht werden so gewählt, dass die aus allen Aufnahmen resultierende Strahlenexposition möglichst gering ist als die aus einer 2-Ebenen-Mammografie resultierende Dosis. Mithilfe unterschiedlicher Rekonstruktionsalgorithmen wird anschließend die Brust in interessierenden Schichten der unterschiedlichen Tiefenlagen parallel zur Detektoroberfläche visualisiert.

Die digitale Tomosynthese der Brust hat daher das Potenzial, die unerwünschte Maskierung durch überlagerte Strukturen zu beiseitigen und so die Anzahl der falsch positiven und falsch negativen Untersuchungsergebnisse zu verringern. Ob die DBT dabei als Alternative zur digitalen Mammografie gesehen werden kann oder nur ein additives Untersuchungsverfahren im Rahmen der Abklärungsdiagnostik darstellt, ist noch nicht entschieden [7–14].

Ein neuartiges Verfahren ist auf der Basis von 2 Mammografieaufnahmen (c–c und c–c plus 4°) (Stereoskopie) (◉ **Abb. 2**) entwickelt worden, um unter Verwendung einer linearen Polfilterbrille ein 3-dimensionales Gesamtbild der Brust (3-D) (◉ **Abb. 3**) zu erhalten.

Die vorliegende Arbeit ist die erste, orientierende Phantomstudie an einem digitalen Mammographiesystem (◉ **Tab. 1**) zum Vergleich der Detektion von simulierten Mikrokalzifikationen, fadenartigen Strukturen und tumorähnlichen Massen in 2-D- bzw. 3-D-Visualisierung (◉ **Abb. 1**) [15, 16]. Die in ◉ **Tab. 2** aufgeführten Detektionsergebnisse zeigen jedoch keine Unterschiede. Während die simulierten Mikrokalzifikationen jeweils zu 95,6% mit beiden Visualisierungsverfahren detektiert werden konnten, lag das Ergebnis für die fadenartigen Strukturen und tumorähnlichen Massen bei 100%. Hier zeigt sich, dass das eingesetzte Phantom zumindest zwar für eine grobe Orientierung ausreicht, nicht aber für eine differenzierte Beurteilung leistungsstarker digitaler Bildgebungssysteme. Dies wird auch dahingehend bestätigt, dass sich, bezogen auf die Phantomuntersuchung, trotz der großen Erfahrungsspannbreite der 5 Untersucher (3 Monate bis 5 Jahre), keine Unterschiede in der Detektionsrate ergaben.

Die hier mit dem Wisconsin Mammographic Random Phantom (◉ **Abb. 1**) [17] erzielten Ergebnisse sind trotz aller Limitationen als Erfüllung notwendiger Mindestanforderungen zu werten. Eine hinreichende Grundlage für den uneingeschränkten klinischen Einsatz des neuen Systems können sie nicht liefern. Derartige belastbare Ergebnisse könnte nur eine umfangreiche Untersuchung zum Kontrastaufklärungsvermögen mit dem derzeit national und international als Standardphantom geltenden CDMAM-Phantom liefern [18, 19]. Allerdings sind auch bei diesem Prüfkörper unter Vernachlässigung des anatomischen Rauschens lediglich Objekte vor homogenem Hintergrund zu detektieren. Darüber hinaus existieren neuentwickelte Phantomsysteme [20, 21], deren abschließende Ergebnisse noch ausstehen.

Das neuartige Verfahren zur 3-dimensionalen Darstellung der Brust in einem Gesamtbild unter Verwendung einer linearen Polfilterbrille stellt eine, gerade auch im Vergleich zur Tomosynthese [22], wichtige Innovation dar. Hinzukommend ist es gleichzeitig der entscheidende Schritt zur zukünftigen realen, quasi online 3-D-Visualisierung der Brust mit Verfügbarkeit an allen gewünschten Arbeitsplätzen (PACS). Hierzu sind neben einer entsprechenden Software zusätzlich Monitore mit einer Auflösung mit mindestens 3,5 × 3,5 k notwendig, womit dann der Verzicht auf zusätzliche Hilfsmittel (z. B. Brille) gegeben ist. Entwicklungen in dieser Hinsicht sind im Experimentalstadium. Ob dann jedoch eine Verbesserung der Detektionsrate von abzu-

klärenden Befunden (richtig positive Resulte) unter gleichzeitiger Reduzierung der falsch negativen Ergebnisse auch unter Einsatz computergestützter Diagnosesysteme (CAD) erreicht werden kann, bleibt abzuwarten. Die Aussicht jedoch auf reale 3-D-gesteuerte Interventionen, Planung des onkologischen Managements unter Einbeziehung der Kosmetik, erscheint vielversprechend.

## Interessenkonflikt

▼  
Nein.

## Literatur

- 1 *Pisano ED, Gatsonis C, Hendrick E et al.* Diagnostic performance of digital versus film mammography for breast-cancer screening. *N Engl J Med* 2006; 353: 1773–1783
- 2 *Diekmann F, Bick U.* Tomosynthesis and contrast-enhanced digital mammography: recent advances in digital mammography. *Eur Radiol* 2007; 17: 3086–3092
- 3 *Skaane P.* Studies comparing screen-film mammography and full-field digital mammography in breast cancer screening: updated review. *Acta Radiol* 2009; 50: 3–14
- 4 *Schulz-Wendtland R, Fuchsjäger M, Wacker T et al.* Digital mammography: an update. *Eur J Radiol* 2009; 72: 258–265
- 5 *Heywang-Köbrunner SH, Hacker A, Sedlacek S.* Contrast-enhanced MRI for early detection and staging of breast cancer: do we need it? *Geburtsh Frauenheilk* 2010; 70: 184–193
- 6 *Ruckhäberle E, Rody A, Kaufmann M.* Report of the 32nd Annual San Antonio Breast Cancer Symposium, December 10–13, 2009. An international scientific symposium for interaction and exchange among basic scientists and clinicians in breast cancer. *Geburtsh Frauenheilk* 2010; 70: 177–183
- 7 *Poplack SP, Tosteson TD, Kogel CA et al.* Digital breast tomosynthesis: initial experience in 98 women with abnormal digital screening mammography. *AJR* 2007; 189: 616–623
- 8 *Andersson I, Ikeda DM, Zackrisson S et al.* Breast tomosynthesis and digital mammography: a comparison of breast cancer visibility and BIRADS classification in a population of cancers with subtle mammographic findings. *Eur Radiol* 2008; 18: 2817–2825
- 9 *Good WF, Abrams GS, Catullo VJ et al.* Digital breast tomosynthesis: a pilot observer study. *AJR* 2008; 190: 865–869
- 10 *Smith AP, Rafferty EA, Niklason L.* Clinical performance of breast tomosynthesis as a function of radiologist experience level. *LNCS* 2008; 5116: 61–66
- 11 *Gur D, Abrams GS, Chough DM et al.* Digital breast tomosynthesis: observer performance study. *AJR* 2009; 193: 586–591
- 12 *Kontos D, Bakic PR, Carton AK et al.* Parenchymal texture analysis in digital breast tomosynthesis for breast cancer risk estimation: a preliminary study. *Acad Radiol* 2009; 16: 283–298
- 13 *Fömvik D, Zackrisson S, Ljunberg O et al.* Breast tomosynthesis: accuracy of tumor measurement compared with digital mammography and ultrasonography. *Acta Radiologica* 2010; 51: 240–247
- 14 *Teertstra HJ, Loo CE, van den Bosch MA et al.* Breast tomosynthesis in clinical practice: initial results. *Eur Radiol* 2010; 20: 16–24
- 15 *Schulz-Wendtland R, Hermann KP, Wenkel E et al.* First experiments for the detection of simulated mammographic lesions: Digital full field mammography with a new detector with a double plate of pure selenium. *Radiologie* 2011; 51: 130–134
- 16 *Schulz-Wendtland R, Hermann KP, Adamietz B et al.* Comparison of dignity determination of mammographic microcalcification with two systems for digital full-field mammography with different detector resolution: A retrospective clinical study (n=50). *Radiologie* 2011; 51: 126–129
- 17 *Schulz-Wendtland R, Hermann KP, Lell M et al.* Phantomstudie zur Detektion simulierter Läsionen an fünf verschiedenen digitalen und einem konventionellen Mammographiesystem. *Fortschr Röntgenstr* 2004; 176: 1127–1132
- 18 *Blendl C, Hermann KP, Mertelmeier T.* PAS 1054: Anforderungen und Prüfverfahren für digitale Mammographie-Einrichtungen. Berlin: Beuth Verlag; 2005

- 19 *van Engen R, van Woudenberg S, Bosmans H et al.* European Protocol for the Quality Control of the physical and technical Aspects of Mammography Screening. In: Perry N, Broeders M, de Wolf C et al., eds. European Guidelines for Quality Assurance in Breast Cancer Screening and Diagnosis. 4th ed. Luxembourg: European Communities; 2006: 157–166
- 20 *Carton AK, Bakic P, Ullberg C et al.* Development of a physical 3D anthropomorphic breast phantom. *Med Phys* 2011; 38: 891–896
- 21 *Engelken FJ, Sack I, Klatt D et al.* Evaluation of tomosynthesis elastography in a breast-mimicking phantom. *Eur J Radiol* 2011; Jul 1 [epub ahead of print]
- 22 *Webb LJ, Samei E, Lo JY et al.* Comparative performance of multiview stereoscopic and mammographic display modalities for breast lesion detection. *Med Phys* 2011; 38: 1972–1980
